# Supplementary material for: Acid-free synthesis of oxygen-enriched electroactive carbon with unique square pores from salted seaweed for robust supercapacitor with attractive energy density
Source: Royal Society of Chemistry journal article supplement (doi:10.1039/c8gc02349b), 2018-01-01
Supplement: c8gc02349b1.pdf [file c8gc02349b1.pdf]

## Supporting Information

### Acid-free synthesis of oxygen-enriched electroactive carbon with unique square pore from salted seaweed for robust supercapacitor with attractive energy density

Chunfeng Xue\*, Lin Feng, Yanan Hao, Fujuan Yang, Qian Zhang, Xuli Ma, and Xiaogang Hao\*

Department of Chemical Engineering, College of Chemistry and Chemical Engineering,

Taiyuan University of Technology, Taiyuan 030024, P. R. China

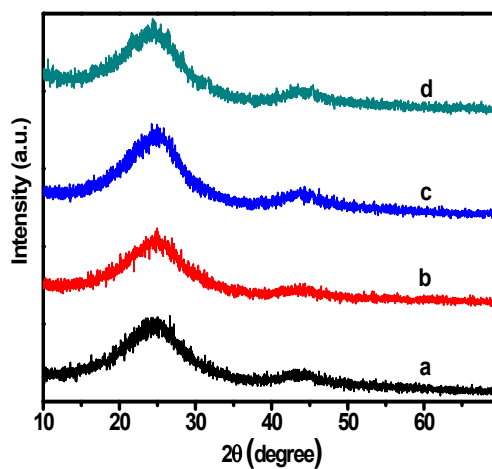

**Fig. S1** XRD patterns of samples: (a) SC-800, (b) OPEC-700, (c) OPEC-800, and (d)  
OPEC-900

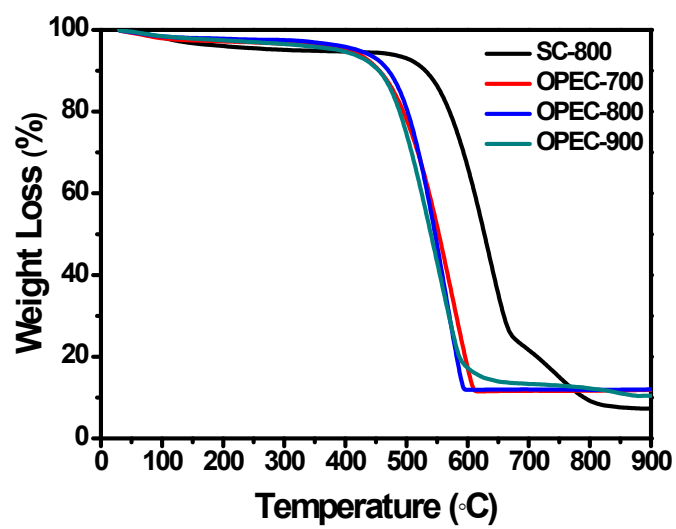

Fig. S2 TG curves in air of samples SC-800, OPEC-700, OPEC-800, and OPEC-900
